# Supplementary material
Source: publisher figshare collection journal article supplement (https://acs.figshare.com/ndownloader/files/5747556)
Supplement: Supplementary file 1 [file 5747556]

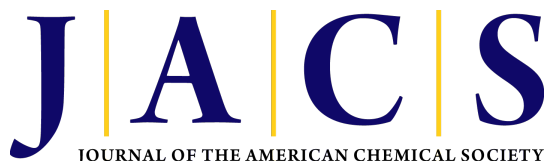

JOURNAL OF THE AMERICAN CHEMICAL SOCIETY

J. Am. Chem. Soc., 1996, 118(9), 2267-2274, DOI: [10.1021/ja9532998](https://doi.org/10.1021/ja9532998)

#### Terms & Conditions

Electronic Supporting Information files are available without a subscription to ACS Web Editions. The American Chemical Society holds a copyright ownership interest in any copyrightable Supporting Information. Files available from the ACS website may be downloaded for personal use only. Users are not otherwise permitted to reproduce, republish, redistribute, or sell any Supporting Information from the ACS website, either in whole or in part, in either machine-readable form or any other form without permission from the American Chemical Society. For permission to reproduce, republish and redistribute this material, requesters must process their own requests via the RightsLink permission system. Information about how to use the RightsLink permission system can be found at <http://pubs.acs.org/page/copyright/permissions.html>

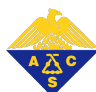

ACS Publications

MOST TRUSTED. MOST CITED. MOST READ.

Copyright © 1996 American Chemical Society

J 2274-1

### Supplementary Material

#### Luminescence Quenching in Supramolecular Systems: A Comparison of DNA- and SDS Micelle Mediated Photoinduced Electron Transfer between Metal Complexes

M. R. Arkin, E. D. A. Stemp, C. Turro, N. J. Turro, J. K. Barton

Figure 1S. Ultraviolet-visible spectra of  $\text{Rh}(\text{phi})_2\text{bpy}^{3+}$  (left) and  $\text{Rh}(\text{phen})_2\text{phi}^{3+}$  (right) in water (—) and in SDS micelles (-----). 10 nm red-shifts in absorbance bands of the phi ligand are indicative of binding in a hydrophobic environment.

Figure 2S. Stern-Volmer plots showing the quenching of  $\text{Ru}(\text{phen})_2\text{dppz}^{2+}$  by  $\text{Rh}(\text{phi})_2\text{bpy}^{3+}$  and  $\text{Rh}(\text{phen})_2\text{phi}^{3+}$  in basic solution. 40  $\mu\text{M}$   $\text{Ru}(\text{phen})_2\text{dppz}^{2+}$ , 13 mM SDS, 10 mM tris buffered to pH 8.5. Quenching by  $\text{Rh}(\text{phi})_2\text{bpy}^{3+}$  of emission intensity ( $\blacklozenge$ ) and lifetime ( $\blacktriangledown$ ); quenching by  $\text{Rh}(\text{phen})_2\text{phi}^{3+}$  of emission intensity ( $\bullet$ ) and lifetimes ( $\blacktriangle$ ). Above the  $\text{pK}_a$  of Rh(III) complexes, Stern-Volmer plots become upward-curving, and  $\text{Rh}(\text{Hphi})_2\text{bpy}^+$  reacts more than  $\text{Rh}(\text{phen})_2(\text{Hphi})^{2+}$ .

J2274-2

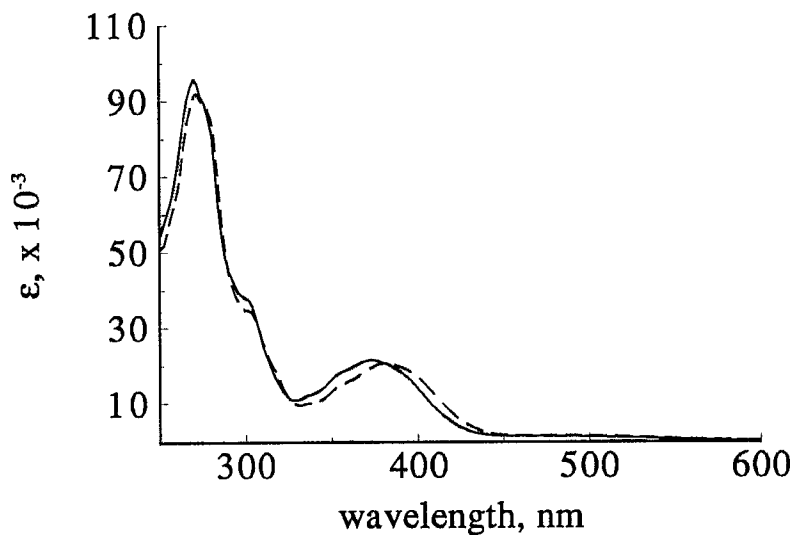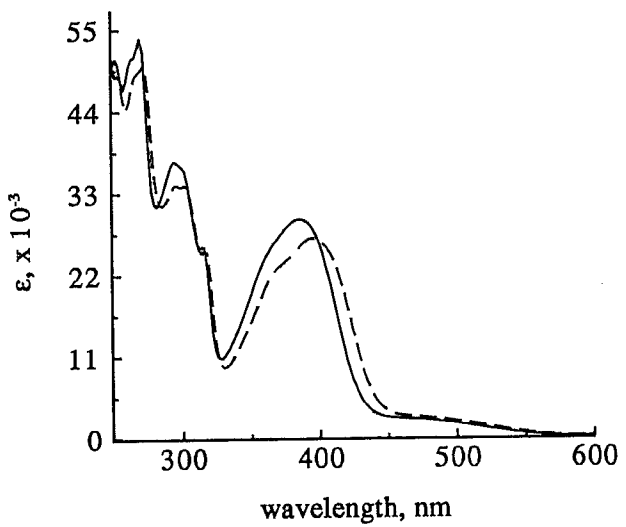

Figure 1S

J2274-3

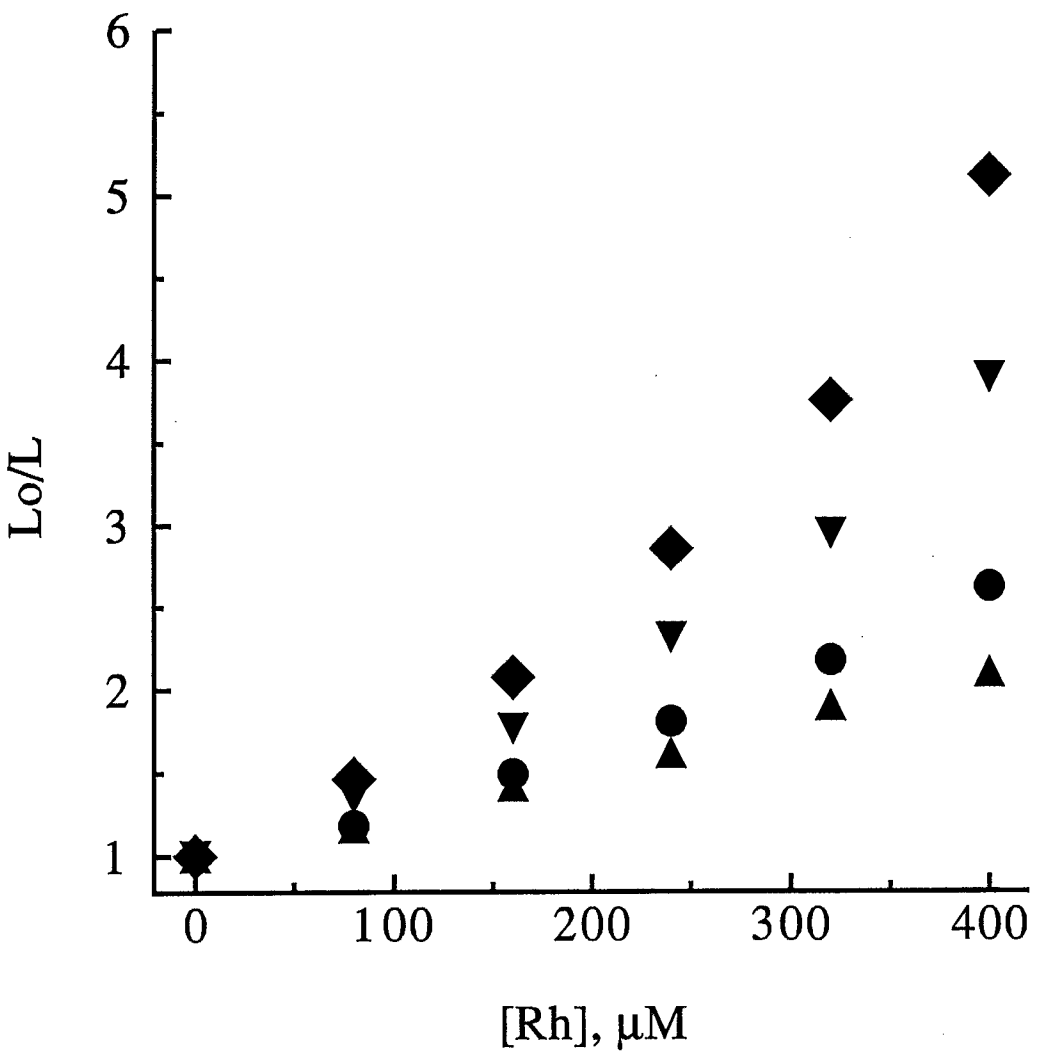

Figure 2S
